# Supplementary material
Source: PubMed Central journal article supplement (PMC3670361)
Supplement: 1222670110_pnas.201222670SI.pdf [file 1222670110_pnas.201222670SI.pdf]

# Supporting Information

Hsieh et al. 10.1073/pnas.1222670110

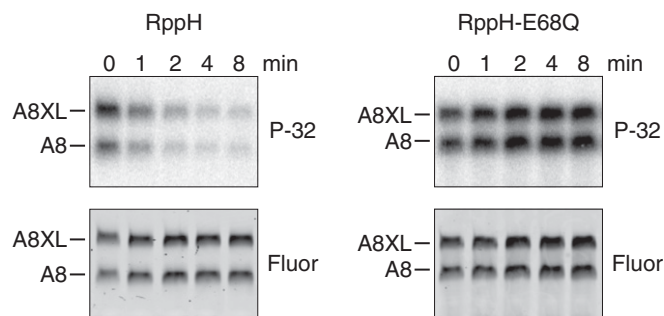

**Fig. S1.** Phosphate removal from A8 and A8XL by *Bacillus subtilis* RppH. In vitro transcribed A8 bearing a  $\gamma$ - $^{32}\text{P}$  radiolabel and an internal fluorescein label was mixed with labeled A8XL and treated with purified RppH or RppH-E68Q (8 nM), and the radioactivity (P-32) and fluorescence (Fluor) of each RNA were monitored as a function of time by gel electrophoresis.



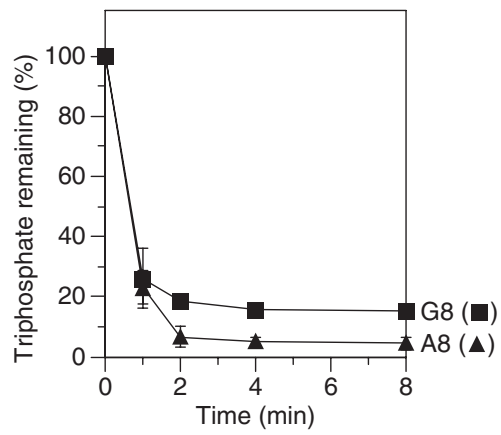

**Fig. S3.** Relative reactivity of A8 and G8. Phosphate removal from A8 and G8 by equal amounts of RppH was monitored as in Fig. 2A and quantified by normalizing the radioactivity remaining in each RNA to the corresponding fluorescence intensity. Each time point is the average of two or more independent measurements.

Table S1. DNA oligonucleotides used in these studies

| Name                  | Sequence                                                                    | Purpose                                                         |
|-----------------------|-----------------------------------------------------------------------------|-----------------------------------------------------------------|
| A8-5                  | <u>AATTCCTGCAGTAATACGACTCACTATTAGAACAAACGGCG</u>                            | Template for A8XL and A8                                        |
| A8XL-3                | mUmCCCCTGGTTTCCCCTGGTTCGCGTTTCCGCGTGGCGCCGCGTTACCGC<br><u>GGGCGCGTTGTCT</u> | Template for A8XL                                               |
| A8-3                  | mUmCGCGTTTCCGCGTGGCGCCGCGTTACCGCGCGCCGTTGTTCT                               | Template for A8                                                 |
| A4-5                  | <u>AATTCCTGCAGTAATACGACTCACTATTAGAAGGCGC</u>                                | Template for A4 <sub>AGAA</sub>                                 |
| A4-3                  | mUmCGCGTTTCCGCGTGGCGCCGCGTTACCGCGCGCCTTCTAATA                               | Template for A4 <sub>AGAA</sub>                                 |
| A3-5                  | <u>AATTCCTGCAGTAATACGACTCACTATTAGAGGCGC</u>                                 | Template for A3                                                 |
| A3-3                  | mUmCGCGTTTCCGCGTGGCGCCGCGTTACCGCGCGCCTCTAATAG                               | Template for A3                                                 |
| A2-5                  | <u>AATTCCTGCAGTAATACGACTCACTATTAGGCGCG</u>                                  | Template for A2                                                 |
| A2-3                  | mUmCGCGTTTCCGCGTGGCGCCGCGTTACCGCGCGCCCTAATAGT                               | Template for A2                                                 |
| A1-5                  | <u>AATTCCTGCAGTAATACGACTCACTATTAGGCGC</u>                                   | Template for A1 and A1+3                                        |
| A1-3                  | mUmCGCGTTTCCGCGTGGCGCCGCGTTACCGCGCGCCTAATAGTG                               | Template for A1                                                 |
| A1+3-3                | mUmUCTCGCGTTTCCGCGTGGCGCCGCGTTACCGCGCGCCTAATAGTG                            | Template for A1+3                                               |
| A4 <sub>ACAA</sub> -5 | <u>AATTCCTGCAGTAATACGACTCACTATAACAAGGCGC</u>                                | Template for A4 <sub>ACAA</sub>                                 |
| A4 <sub>ACAA</sub> -3 | mUmCGCGTTTCCGCGTGGCGCCGCGTTACCGCGCGCCTTGTATA                                | Template for A4 <sub>ACAA</sub>                                 |
| A4 <sub>AUAA</sub> -5 | <u>AATTCCTGCAGTAATACGACTCACTATAAAGGCGC</u>                                  | Template for A4 <sub>AUAA</sub>                                 |
| A4 <sub>AUAA</sub> -3 | mUmCGCGTTTCCGCGTGGCGCCGCGTTACCGCGCGCCTTATTATA                               | Template for A4 <sub>AUAA</sub>                                 |
| A4 <sub>AGGA</sub> -5 | <u>AATTCCTGCAGTAATACGACTCACTATTAGAGGCGC</u>                                 | Template for A4 <sub>AGGA</sub>                                 |
| A4 <sub>AGGA</sub> -3 | mUmCGCGTTTCCGCGTGGCGCCGCGTTACCGCGCGCCTCCTAATA                               | Template for A4 <sub>AGGA</sub>                                 |
| A4 <sub>AGCA</sub> -5 | <u>AATTCCTGCAGTAATACGACTCACTATTAGCAGGCGC</u>                                | Template for A4 <sub>AGCA</sub>                                 |
| A4 <sub>AGCA</sub> -3 | mUmCGCGTTTCCGCGTGGCGCCGCGTTACCGCGCGCCTGCTAATA                               | Template for A4 <sub>AGCA</sub>                                 |
| A4 <sub>AGUA</sub> -5 | <u>AATTCCTGCAGTAATACGACTCACTATTAGTAGGCGC</u>                                | Template for A4 <sub>AGUA</sub>                                 |
| A4 <sub>AGUA</sub> -3 | mUmCGCGTTTCCGCGTGGCGCCGCGTTACCGCGCGCCTACTAATA                               | Template for A4 <sub>AGUA</sub>                                 |
| G8-5                  | <u>AATTCCTGCAGTAATACGACTCACTATAGGAACAACGGCG</u>                             | Template for G8                                                 |
| G8-3                  | mUmCGCGTTTCCGCGTGGCGCCGCGTTACCGCGCGCCTTGTTC                                 | Template for G8                                                 |
| G4-5                  | <u>AATTCCTGCAGTAATACGACTCACTATAGGAAGGCGC</u>                                | Template for G4 <sub>GGAA</sub>                                 |
| G4-3                  | mUmCGCGTTTCCGCGTGGCGCCGCGTTACCGCGCGCCTTCTATA                                | Template for G4 <sub>GGAA</sub>                                 |
| G3-5                  | <u>AATTCCTGCAGTAATACGACTCACTATAGGAGGCGC</u>                                 | Template for G3                                                 |
| G3-3                  | mUmCGCGTTTCCGCGTGGCGCCGCGTTACCGCGCGCCTCCTATAG                               | Template for G3                                                 |
| G2-5                  | <u>AATTCCTGCAGTAATACGACTCACTATAGGGGCGC</u>                                  | Template for G2                                                 |
| G2-3                  | mUmCGCGTTTCCGCGTGGCGCCGCGTTACCGCGCGCCCTATAGT                                | Template for G2                                                 |
| G1-5                  | <u>AATTCCTGCAGTAATACGACTCACTATAGGGGCGC</u>                                  | Template for G1                                                 |
| G1-3                  | mUmCGCGTTTCCGCGTGGCGCCGCGTTACCGCGCGCCTATAGTG                                | Template for G1                                                 |
| G0-5                  | <u>AATTCCTGCAGTAATACGACTCACTATAGGCGC</u>                                    | Template for G0                                                 |
| G0-3                  | mUmCGCGTTTCCGCGTGGCGCCGCGTTACCGCGCGCCTATAGTGAG                              | Template for G0                                                 |
| G4 <sub>GAAA</sub> -5 | <u>AATTCCTGCAGTAATACGACTCACTATAGAAAAGGCGC</u>                               | Template for G4 <sub>GAAA</sub>                                 |
| G4 <sub>GAAA</sub> -3 | mUmCGCGTTTCCGCGTGGCGCCGCGTTACCGCGCGCCTTCTATA                                | Template for G4 <sub>GAAA</sub>                                 |
| G4 <sub>GCAA</sub> -5 | <u>AATTCCTGCAGTAATACGACTCACTATAGCAAAGGCGC</u>                               | Template for G4 <sub>GCAA</sub>                                 |
| G4 <sub>GCAA</sub> -3 | mUmCGCGTTTCCGCGTGGCGCCGCGTTACCGCGCGCCTTGCTATA                               | Template for G4 <sub>GCAA</sub>                                 |
| G4 <sub>GUAA</sub> -5 | <u>AATTCCTGCAGTAATACGACTCACTATAGTAAGGCGC</u>                                | Template for G4 <sub>GUAA</sub>                                 |
| G4 <sub>GUAA</sub> -3 | mUmCGCGTTTCCGCGTGGCGCCGCGTTACCGCGCGCCTTACTATA                               | Template for G4 <sub>GUAA</sub>                                 |
| YG-DELN R             | CCGTCAAAAAGTTTCTGGGCTATCAGGCTG                                              | Northern blot probe for mini <i>yhxA-glpP</i> mRNA              |
| tRNA <sub>Cys</sub>   | GGATTCCAACCGGGATAAAGG                                                       | Northern blot probe for tRNA <sup>Cys</sup> (internal standard) |
| RACE 1                | CGACTGGAGCACGAGGACACTGACATGGACTGAAGGAGTAGrArArA                             | DNA-RNA chimera used for RACE ligation                          |
| PRB233                | TCCGAGTTCTCCATCACAAATGTATT                                                  | Reverse transcription and first round of nested PCR             |
| RACEplus              | CGACTGGAGCACGAGGACACTGA                                                     | First round of nested PCR                                       |
| PRB232                | AGTGCAATTGTATCAGTGCATGAAA                                                   | Second round of nested PCR and DNA sequencing                   |
| RACenest              | GGACTGACATGGACTGAAGGAGTA                                                    | Second round of nested PCR                                      |

All sequences are in the 5'-to-3' orientation. mU or mC, 2'-O-methyl nucleotide; rA, ribonucleotide. Complementary regions in the oligonucleotide pairs used to prepare each in vitro transcription template are underlined.
